# Supplementary material
Source: Springer Nature journal article supplement (https://www.springermedizin.de/resource/supplementary/12882_2012_554_MOESM1_ESM.pdf/9453800)
Supplement: MOESM1 [file 9453800]

## Members of the Canadian Critical Care Trials Group H1N1 Collaborative

Bandrauk N, Leonard S, Moores E, Barter J, Fiander J, Hall R, Green R, Heinzler D, Julien L, Wright D, Soder C, Earle R, King S, Lauzier F, Turgeon A, Roy C, Gagne C, Lellouche F, Ferland M-C, Dussault P, Poirier G, Lamontagne F, Neas I, Masse V, Yale P, Albert M, Arsenault I, Deroy P, Laporta D, Hornstein D, Verhoef B, Khwaja K, Banici L, Ahern SP, Skrobic Y, Harvey J, Santschi M, Ducharme-Crevier L, Jouvett P, Lacroix J, Withington D, Al Otaibi T, Dugas M-A, St-Pierre L, Cassista J, Gosselin L, McIntyre L, Gaudet C, Saginur R, Pagliarello J, Watpool I, Mcardle T, Foxall J, Murphy E, Bergeron C, Lewis MJ, Muscedere J, Godfrey N, Fleury M, Hollinger G, Malus E, Williams N, Hrytsyk M, Meade M, Spoto C, Freitag A, Choong K, Irwin N, Karachi T, Lapinsky S, Ferguson N, Ethier C, Stewart T, Lubchansky S, Cook DJ, MacDonald E, Wilton K, Tkaczyk A, Kho M, Sivaloganathan L, Cirone R, Marshall J, Burns K, Smith O, Friedrich J, Fry B, Porretta K, Fowler R, Long J, Pinto R, Adhikari NKJ, Marinoff N, Maher A, Moran C, Delaney J, Singh JM, Herridge M, Granton J, Brockest N, Matte A, Tansey C, Chu L, Dennis M, di Nino M, McRitchie D, Correa J-A, Martin C, Campbell E, Menon K, Creery D, Doherty D, Dhanani S, Ward R, Alsaati B, Choong K, Duffett M, Irwin N, Caceres TL, Hutchison J, Keating L, Gaiteiro R, Krancevic A-M, Van Huyse J, Kornecki A, Foster J, Kukreti B, Boyle D, Kostiw K, Green L, Fung D, Jacko N, Herzog J, Berg G, Bettello P, Ross A, Marcello N, Agarwala R, Anderson W, Stoger S, Kumar A, Zarychanski R, Siddiqui F, Sharma S, Wiebe K, Ramsey C, Olafson K, Funk D, Garland A, Janz W, Marten N, Siddiqui M, Veroukis S, Kesselman M, Angelo L, Wali Ahsan M, Penner C, Wong A, Shaw S, Friedt J, Wolffe G, Thomson S, Holt T, Andreychuk B, Stelfox T, Bobranska-Artiuch B, Heule M, Kutsogiannis D, Johnston C, Bartel R, Thompson P, Jossy D, Norris S, Stollery DE, MacLure T, Hardy-Joel R, Barchard J, Bagshaw SM, Irwin M, Joffe A, Sheppard C, Gresiuik C, Hodson L, Gilfoyle E, Menzies K, Dodek P, Ashley BJ, Dunham H, Griesdale D, Foster D, Gardner M, Logie S, Reynolds S, Keenan S, Mans S, Palmer J, Svetik M, Wood G, Atkins L, Aldred-Portman B, Skippen P, Kisson N, Krahn G, Burzynski J, Barclay A, Patel A, Kandola K, Pender K, Hanley B, Braden KD, Beckett R, Bilton P.
